# Supplementary material
Source: publisher figshare collection journal article supplement (https://frontiersin.figshare.com/ndownloader/files/23425886)

**Supplementary Figure 4.** “Placement effect” of biofertilizer on the straw yields. Effect of single inoculation of AMF and combined application of AMF+PGPR in precultured pigeon pea in polybag vs application in precultured pigeon pea alone on straw yield of finger millet (dark shaded bars) and pigeon pea (light shaded bars) in intercropping system at Bangalore and Kolli Hills during the season 2014-15 and 2015-16. Significant differences among means were calculated for total yield of finger millet and pigeon pea. Each error bar indicates +1 standard deviation of the mean. Alpha ( $\alpha$ ) and beta ( $\beta$ ) above the bars indicate letters of significance for combined yields finger millet and pigeon pea. Bars not sharing the same letters are significantly different from each other at  $p < 0.05$ .

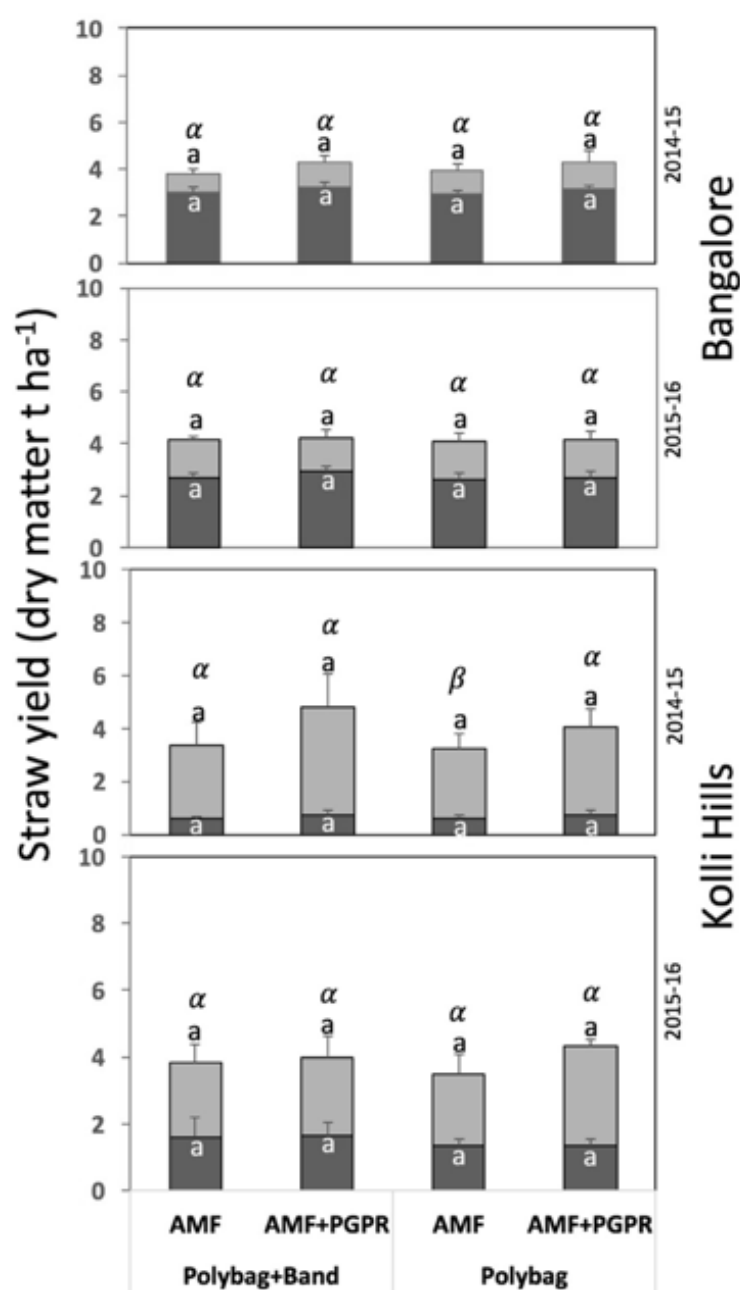

Supplement: Supplementary file 1 [file 23425886]
